# Cardiovascular Risks in Patients with Loeys–Dietz Syndrome

Frank Fideler, M.D., Harry Magunia, M.D., Christian Grasshoff, M.D., Ph.D.

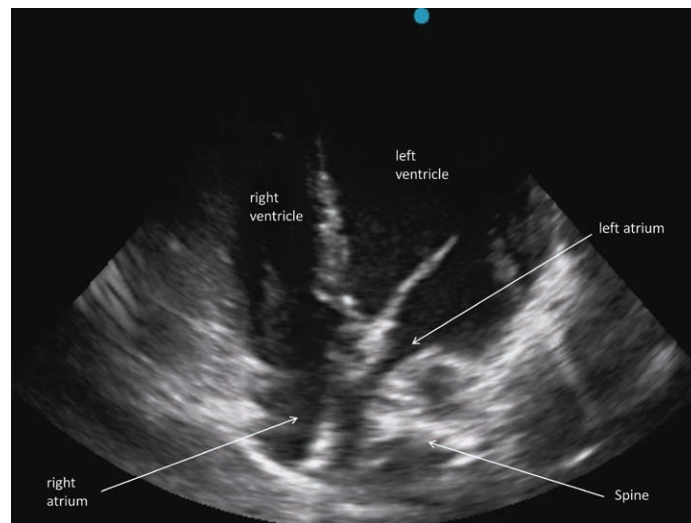

Compression of the left atrium is well described in cases of mediastinal masses, pericardial effusion, or aortic aneurysms. Here, we present a transthoracic apical four-chamber view of a patient with Loeys–Dietz syndrome that displays a severe slit-like compression of the left atrium between the sternum and the thoracic spine (Supplemental Digital Content, <http://links.lww.com/ALN/C263>). Loeys–Dietz syndrome is a Marfan-like autosomal dominant connective tissue disorder which typically includes aneurysmal aorta or adjacent arterial branches.<sup>1</sup> The vascular course is aggressive, with complications developing at smaller aortic dimensions compared to Marfan syndrome. Many patients die in their 20s due to aortic dissection. Up to 60% of patients with Loeys–Dietz syndrome show scoliosis, which can compress the heart, particularly when manifesting with concomitant *pectus excavatum*.<sup>2</sup> Apart from cardiovascular risks, airway management can be complicated in these patients by craniosynostosis, cleft palate, retrognathia, and cervical spine instability. Cervical spine manipulation should be minimized by using video laryngoscopy or fiberoptic intubation for airway management.<sup>3</sup>

In patients with Loeys–Dietz syndrome, complete aortic imaging is recommended at the time of the initial diagnosis and every 6 months thereafter.<sup>1</sup> In addition, preoperative transthoracic echocardiography for evaluation of aortic root and cardiac function should be strongly considered. In patients with severe cardiac compression, all maneuvers to improve cardiac preload should be employed. These include left lateral

or Trendelenburg positioning, liberal fluid management, and avoidance of high mean airway pressures. Adequate ventricular filling can be sufficiently monitored by repeated intraoperative echocardiography.

## Competing Interests

Dr. Magunia has received a speaker's honorarium from CSL Behring GmbH (Marburg, Germany). The other authors declare no competing interests.

## Correspondence

Address correspondence to Dr. Fideler: [frank.fideler@med.uni-tuebingen.de](mailto:frank.fideler@med.uni-tuebingen.de)

## References

1. Loughborough WW, Minhas KS, Rodrigues JCL, Lyen SM, Burt HE, Manghat NE, Brooks MJ, Stuart G, Hamilton MCK: Cardiovascular manifestations and complications of Loeys–Dietz syndrome: CT and MR imaging findings. *Radiographics* 2018; 38:275–86
2. Suarez B, Caldera A, Castillo M: Imaging and clinical features in a child with Loeys–Dietz syndrome. A case report. *Interv Neuroradiol* 2011; 17:9–11
3. Bunting AC, Bould MD: Hemodynamic instability during anesthesia in an adolescent with Loeys–Dietz syndrome: A case report. *Paediatr Anaesth* 2014; 24:1302–4

Supplemental Digital Content is available for this article. Direct URL citations appear in the printed text and are available in both the HTML and PDF versions of this article. Links to the digital files are provided in the HTML text of this article on the Journal's Web site ([www.anesthesiology.org](http://www.anesthesiology.org)).

Published online first on February 10, 2020. From the Department of Anesthesiology and Intensive Care Medicine, University Hospital Tuebingen, Tuebingen, Germany.

Copyright © 2020, the American Society of Anesthesiologists, Inc. All Rights Reserved. *Anesthesiology* 2020; 132:1554. DOI: 10.1097/ALN.0000000000003190
